# Supplementary material for: Sc2O3, Er2O3, and Y2O3 thin films by MOCVD from volatile guanidinate class of rare-earth precursors
Source: Royal Society of Chemistry journal article supplement (doi:10.1039/c2dt31219k), 2012-01-01

### Supplementary Information:

**Table SI-1:** Overview of the fragments observed in the EI-MS (70 eV) spectra of [RE(DPDMG)<sub>3</sub>]  
 RE = Sc (1), Er (2), Y (3), Gd and Dy<sup>1-2</sup>

| Fragment                                                                                                             | [RE(DPDMG) <sub>3</sub> ] |               |            |               |            |               |            |               |
|----------------------------------------------------------------------------------------------------------------------|---------------------------|---------------|------------|---------------|------------|---------------|------------|---------------|
|                                                                                                                      | Sc (1)                    |               | Er (2)     |               | Y (3)      |               | Dy         |               |
|                                                                                                                      | mass (m/z)                | rel. int. (%) | mass (m/z) | rel. int. (%) | mass (m/z) | rel. int. (%) | mass (m/z) | rel. int. (%) |
| [RE(L) <sub>3</sub> ] <sup>3+</sup><br>(C <sub>27</sub> H <sub>60</sub> N <sub>9</sub> RE)                           | 555                       | 29            | 676        | 51            | 599        | 34            | 674        | 49            |
| [(L) <sub>2</sub> RE{(iPrN) <sub>2</sub> C}] <sup>2+</sup><br>(C <sub>25</sub> H <sub>54</sub> N <sub>8</sub> RE)    | 512                       | 1             | 632        | 4             | 555        | 3             | 630        | 4             |
| [RE(L) <sub>2</sub> ] <sup>2+</sup><br>(C <sub>18</sub> H <sub>40</sub> N <sub>6</sub> RE)                           | 385                       | 100           | 506        | 100           | 429        | 100           | 504        | 100           |
| [(L)RE{(iPrN) <sub>2</sub> CNCH <sub>2</sub> }] <sup>2+</sup><br>(C <sub>17</sub> H <sub>36</sub> N <sub>6</sub> RE) | 369                       | 4             | 490        | 9             | 413        | 10            | 488        | 9             |
| [(L)RE{(iPrN) <sub>2</sub> C}] <sup>2+</sup><br>(C <sub>16</sub> H <sub>34</sub> N <sub>5</sub> RE)                  | 341                       | 73            | 341        | 73            | 385        | 46            | 460        | 48            |
| [(L)REN(iPr)CN] <sup>2+</sup><br>(C <sub>13</sub> H <sub>27</sub> N <sub>5</sub> RE)                                 | 300                       | 6             | 462        | 45            | 343        | 12            | 417        | 14            |
| [(L)REN(H)CN] <sup>2+</sup> (C <sub>10</sub> H <sub>21</sub> N <sub>5</sub> RE)                                      | 257                       | 10            | 377        | 20            | 301        | 13            | 376        | 25            |
| [(L)RENH] <sup>2+</sup><br>(C <sub>9</sub> H <sub>21</sub> N <sub>4</sub> RE)                                        | 230                       | 2             | 351        | 3             | 274        | 1             | 349        | 2             |
| [(L)RE] <sup>2+</sup><br>(C <sub>9</sub> H <sub>20</sub> N <sub>3</sub> RE)                                          | 215                       | n.d.          | 336        | 4             | 259        | n.d.          | 334        | n.d.          |
| [{(iPrN) <sub>2</sub> CNCH <sub>2</sub> }RENH] <sup>2+</sup><br>(C <sub>8</sub> H <sub>17</sub> N <sub>4</sub> RE)   | 214                       | 12            | 335        | 20            | 258        | 23            | 333        | 32            |
| [RE{(iPrN) <sub>2</sub> C}] <sup>2+</sup> (C <sub>7</sub> H <sub>14</sub> N <sub>2</sub> RE)                         | n.d.                      | n.d.          | n.d.       | n.d.          | 215        | 3             | 290        | 8             |
| [REN(iPr)] <sup>2+</sup><br>(C <sub>3</sub> H <sub>7</sub> NRE)                                                      | 102                       | 1             | 223        | 1             | 146        | 2             | 220        | 2             |

L = DPDMG = {(iPrN)<sub>2</sub>CNMe<sub>2</sub>}; \* the peak intensity varies from 15 to 1 % in the recorded spectra; n.d. = not detected

[1] A. P. Milanov, R. A. Fischer and A. Devi, *Inorg. Chem.*, 2008, **47**, 11405-11416.

[2] A. P. Milanov, T. Thiede, A. Devi and R. A. Fischer, *J. Am. Chem. Soc.*, 2009, **131**, 17062-17063.

**Fig. S1:** Temperature dependent NMR data of  $[\text{Sc}(\text{DPDMG})_3] \mathbf{1}$

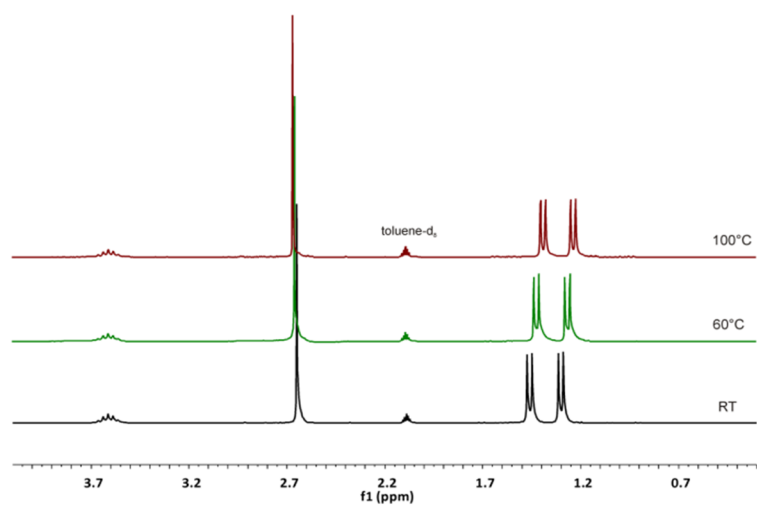

**Fig. S2:** Temperature dependent NMR decomposition data of  $[Y(DPDMG)_3] \mathbf{3}$

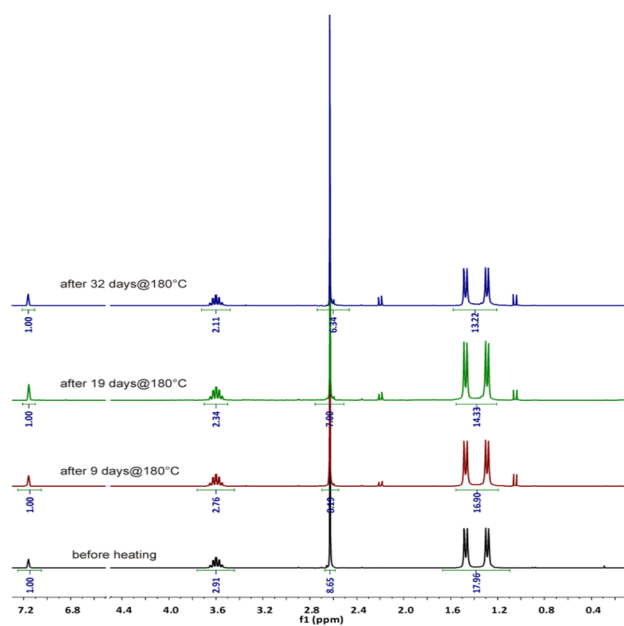

**Fig. S3:** SEM images of  $\text{Er}_2\text{O}_3$  thin films deposited by MOCVD at 400 °C and 650 °C on Si(100) substrates using  $[\text{Er}(\text{DPDMG})_3] \mathbf{2}$  as precursor.

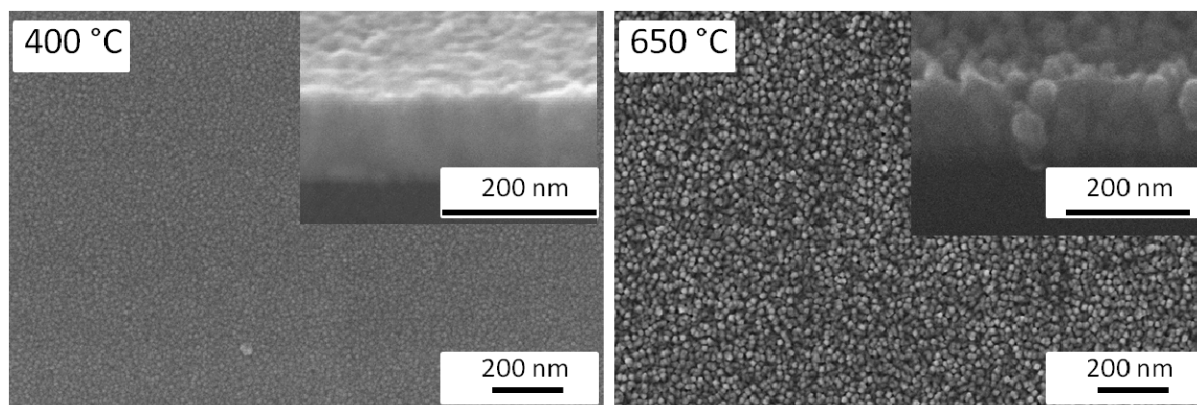

**Fig. S4** AFM micrographs of  $\text{Sc}_2\text{O}_3$  films deposited on Si(100) substrates at 400–700 °C using  $[\text{Sc}(\text{DPDMG})_3] \mathbf{1}$  as precursor.

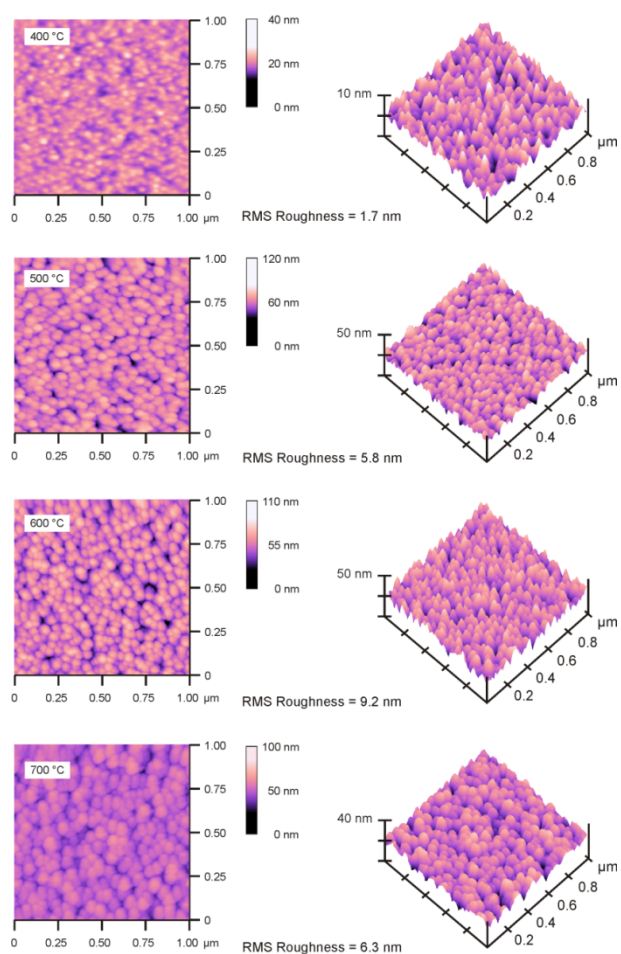

**Fig. S5** AFM micrographs of  $\text{Y}_2\text{O}_3$  films deposited on Si(100) substrates at 400–700 °C using  $[\text{Y}(\text{DPDMG})_3] \mathbf{3}$  as precursor.

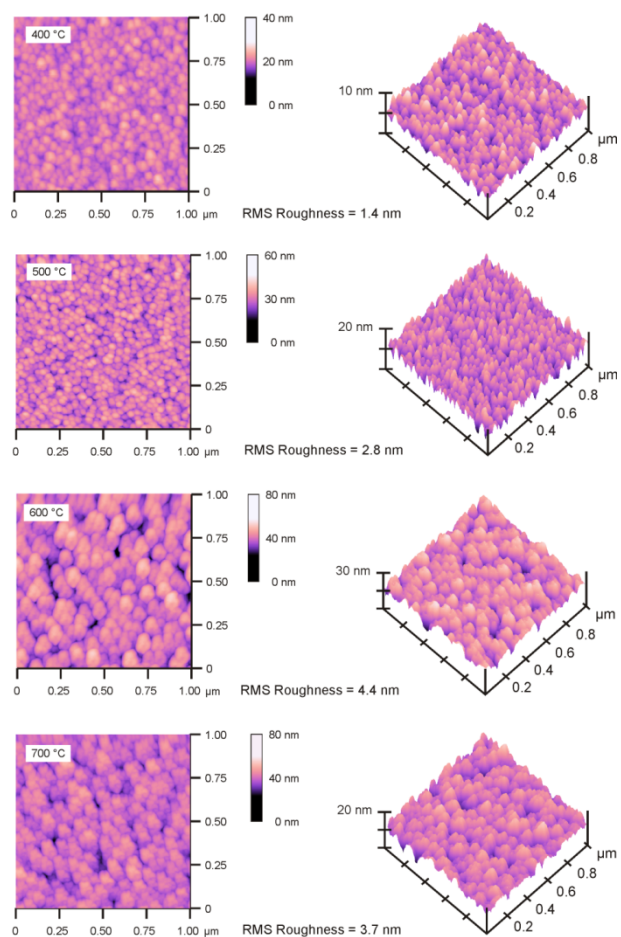

**Fig. S6** EDX spectra of (a)  $\text{Sc}_2\text{O}_3$  and (b)  $\text{Y}_2\text{O}_3$  thin film deposited at 500 °C on Si(100) substrates using  $[\text{Sc}(\text{DPDMG})_3]$  **1** and  $[\text{Y}(\text{DPDMG})_3]$  **3** respectively.

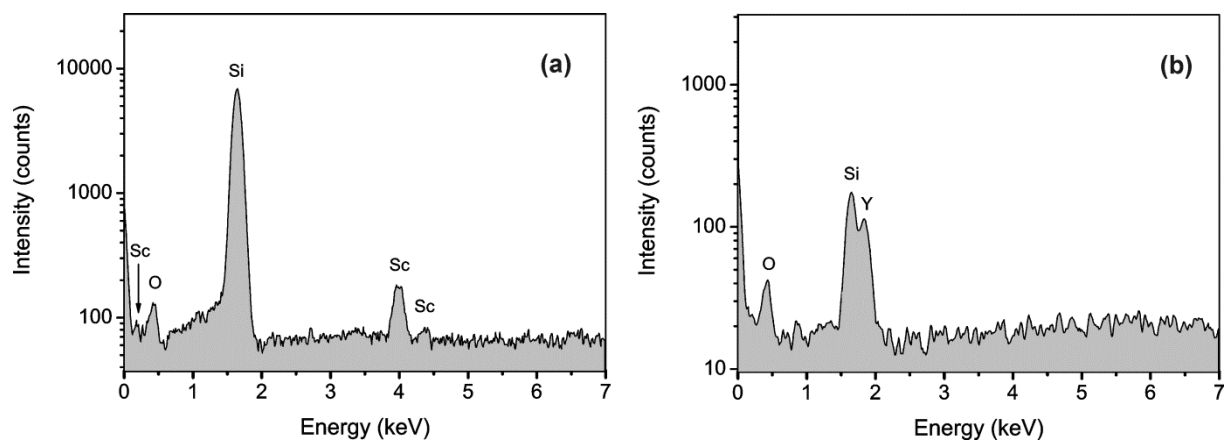

**Fig. S7** RBS spectra of (a)  $\text{Sc}_2\text{O}_3$  and (b)  $\text{Y}_2\text{O}_3$  thin films deposited at 400 °C on glassy carbon substrates using precursors  $[\text{Sc}(\text{DPDMG})_3]$  **1** and  $[\text{Y}(\text{DPDMG})_3]$  **3**, respectively.

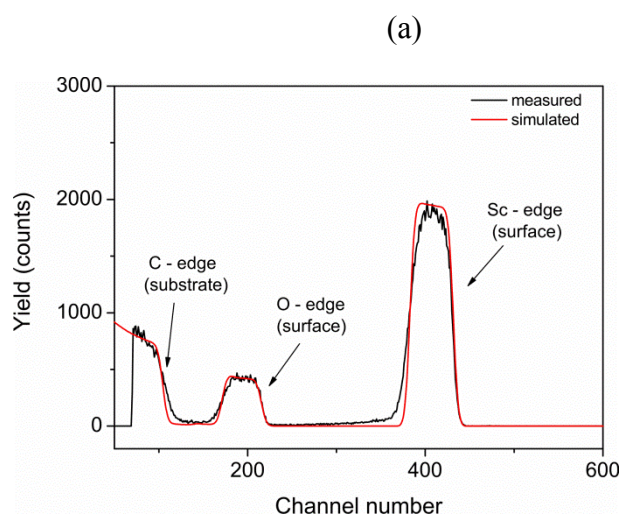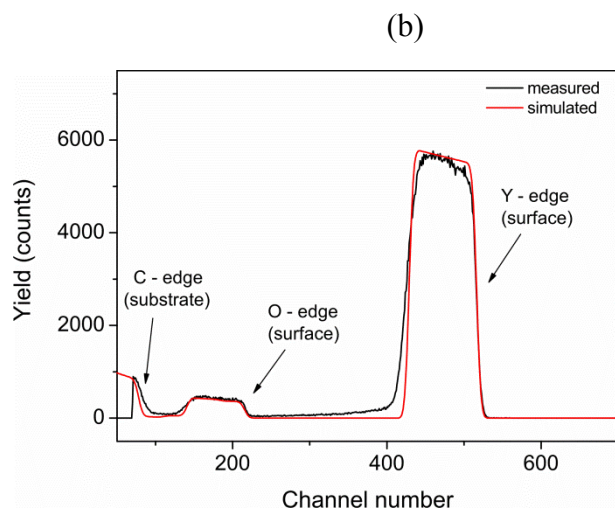



**Fig. S8** (left) Background subtracted NRA (d, p-gamma) spectrum of  $Y_2O_3$  deposited at 500 °C using **G1** ( $2H^+$  beam, 0.98 MeV) (right) Summary of NRA (d, p-gamma) spectra of  $Y_2O_3$  (measured), pure Si(100) (background), Kapton and  $Y_2O_3$  (background subtracted). Kapton ( $C_{22}H_{10}O_4N_2$ ) was used as standard.

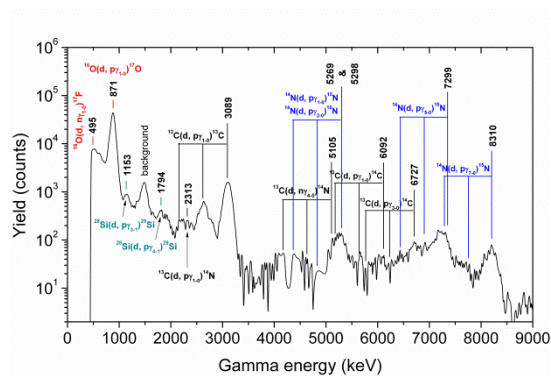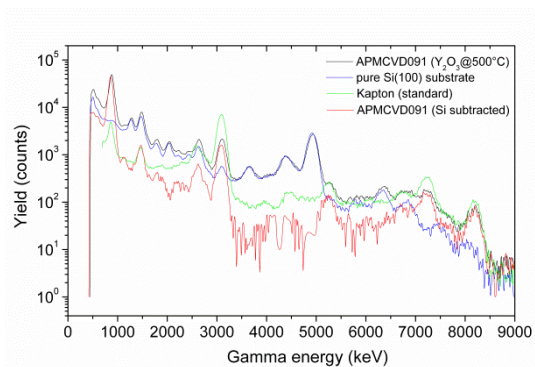

Supplement: c2dt31219k.pdf [file c2dt31219k.pdf]
